# Supplementary material
Source: Research Square preprint supplement (doi:10.21203/rs.3.rs-8744375/v1)
Supplement: Supplementary file 1 [file 3a36760074f150afe1dfd002.docx]

Table 2: Themes, Subthemes and Codes, Descriptions of Codes, and Quotes

| Themes & Subthemes | Description of Codes | Quotes |
| --- | --- | --- |
| Theme 1: Curriculum content and delivery | | |
| Subtheme 1.1: Disability Knowledge Acquisition | - Understanding disability types, causes and prevention - Exploring legal and government policies and support mechanisms - Understanding the emotional needs of disabled individuals - Understanding Rehabilitation and support resources - Addressing medical and management aspects of disabilities - Knowledge of social stigma and challenges of people with disabilites - Knowledge on how to promoting community acceptance | “We would like to be taught about the types and causes of disability because if I know the causes, I can educate on prevention” (Participant 207).    “I want to know how we could reduce the stigma or prevent it, because people living with disability due to the stigma, people aren't letting them out, keeping them indoors no so if you know how to reduce or prevent the stigma and accept them as human beings and treat them well, that's what I want to know” (Participant 609).  "I also want to talk about the curriculum being centered on myths and misconceptions about disability so that we, as educators, can be more empowered. When we have knowledge about the conditions, we'll be able to teach or educate the kids to understand them" (Participant 406). |
| Subtheme 1.2: Variety in Educational resources | - Artificial Intelligence – Chat GPT, Meta A.I - Flexible digital access - Mobile and laptop compatibility – May need to provide devices to support learning. - Educational Resources - Also downloadable resources, multimedia content, Google Search Engine, PubMed, recorded lecture materials, Online and hardcopy materials “Printed handouts”, - Online resources (Google, YouTube - YouTube educational videos) - Visual aids and infographics, Interactive multimedia content - Variety of learning materials: Video projections, PowerPoint presentations - Audio recordings | "Okay, I'll prefer PowerPoint presentations from lecturers in pdf, then podcasts and then also online from Google search" (Participant 503).  "I prefer slides and YouTube learning" (Participant 610).  "E-learning platforms. In my previous experience, they sent slides on the platform, which you could assess and read. So, during the COVID time, they will put the slides on that, whatever they want us to gain knowledge, and then we go and we read, and it's self-explanatory, because they use videos in backing it, and then they break everything down, because we, we didn't have much of in person discussions like this" (Participant 505).  "I prefer the handouts and also flip charts. Flip charts because sometimes the pictures make learning easier" (Participant 608).  "Yes, I think the English, example, like those materials on the page. Sometimes I read, and I don't get the English because it is too big for me. So, when this is online, the same thing happens, but you explain it in simple English that anybody picks it, a person ready it, they can understand" (Participant 203). |
| Subtheme 1.3: Comprehensive, Non-Punitive Assessment Approach | - Some showed a preference for scored assessments that will decide the completion of the course to ensure engagement and seriousness. - Most preferred non-scoring evaluations to avoid intimidation, prefer nonpunitive assessment - Desire for comprehensive evaluation, including:Theoretical knowledge, Practical skill demonstrations - Supervised practical demonstrations - Formative, non-scoring assessments with continuous feedback mechanisms - Competency-based evaluation with guidance and feedback from educators - Practical skill validation - Peer and self-reflection opportunities - Pre-test and post-test assessments - Individual and group learning opportunities | "I prefer the scoring method, because if you have a pass mark, that everybody has to attain before that person can be gathered as fully competent to go and handle disability, that one would be better, if it's non scoring, though you might tell graduate, but maybe somebody might be lacking in some aspect. So, if you are able to score the person, it will also help in future decision-making as to where exactly you have to focus more attention. So, if it's scoring, it will eventually help for evaluation purposes. So, it should be graded" (Participant 501)  “So sometimes, most of us are being intimidated by the scoring and the intimidation can go way to the point that then you feel like there is no sense of coming to the course, but if it's a non-scoring, at least I know that I'm getting somewhere” (Participant 202).  “But for the scoring, if you should put in all your best, and then you write the exams, and the results come and didn't get the marks that you want. Sometimes you become depressed, and then you will lose interest in the end” (Participant 605).  "I also prefer you giving me feedback for each program or per the content that you bring out. You take the feedback per chapter content so that you know the progress. That's what I prefer, not just taking quizzes, feedback and how you can improve" (Participant 509)  "If there are multiple choices that you can, they can assess you to know the knowledge that you have acquired. If you have something, a question wrong, you go back to the video, watch again and then you retake the test " (Participant 505).  “Can we use the two? Because it shows somebody may be more focused, but the person may like, for example, as we mostly use the term "chew and pour", because of the "marks" the person will say, "Oh, I want to learn and get my marks". But what is the impact, and how will the person put it into practice? Can the person do it? So at least, if the two are combined, at least it will really help” (Participant 109). |
| Subtheme 1.4: Variable and negotiable options in timing, scheduling and duration | - Scheduling Flexibility - Flexible timing to accommodate work schedules - Options for: Weekday evening classes, Weekend workshops, Recorded online content - Weekend options - 2-3 sessions per week - 6 to 8 weeks one group, other focus group most fell in 3–6-month course duration (dependent on content and how regularly they meet) - Flexible scheduling (twice weekly, 2-hour sessions) - Weekday evenings preferred is some (5-7 PM), mornings in some - Too varied with different reasons, no unifying coonclusions | "Weekdays in the morning, because sometimes in the evening, other family in family needs will just come across. So, I prefer in the morning" (Participant 409).  "I prefer twice a week, and then it should be within the mid-day around 5 pm to 7 pm. That's two hours duration, and then maximum of three months, we should be done, you get me" (Participant 503).  "For the time, I prefer early morning, during the weekends, and during the weekend. For the evening, I don't think it will be good, but early morning. The reason is because I am working, I don't think I'll get time during the weekdays, so for the weekend, I think I can sacrifice to do it" (Participant 211).  “So, it can be designed to meet the needs of everybody because our needs and values are different. So, if it comes like that, it's favorable for us” (Participant 601). |
| Theme 2: Educational Environment and Experience | | |
| Subtheme 2.1: Skill Development | - Communication skills (including sign language) - Observational abilities – To be able to detect people with disabilities - Empathy and patient interaction - Communications skills on interacting with people with disabilities (Disability etiquette) - Community engagement techniques (to be able to educate better in schools and communities) - Practical care and support strategies | "Sometimes, you have to do a demonstration in front of the students. After that demonstration, because they have seen what you were doing and after you educate them and explain that demonstration, they will understand it better, so that, in case, maybe when they find that situation, they can remember that at least they thought of this, and it will help them how to relate to those children with disabilities” (Participant 109).  "I attended a secondary school with the visually impaired, and then they gave them, they tagged them "Soro". So, instead of them calling them visually impaired, they are calling them "Soro", making fun of them. I think the names that we call them, people should what they are suffering from " (Participant 204).  "You do meet people who cannot communicate because, let's say, they are not able to talk. If I know or learn sign language skills, it will help our communication to be quite easy" (Participant 602). |
| Subtheme 2.2: Emphasis on a Learner-Centred Approach in Teaching Strategies | - Combination of traditional lectures and learner-centred approaches, but with learner-centred / Adult learning approaches being more prevalent - Interactive and participatory methods - Peer teaching and group discussions - Collaborative knowledge construction - Hands-on demonstrations - Role-playing scenarios - Real-world case studies - Simulation exercises - Instructor-guided research and discussions - Student-led presentations - Opportunities for peer learning and knowledge sharing - Structured content delivery with interactive learning - Strong preference for adult learning strategies - Self-directed learning - Emphasis on individual learning pace - Minimal hierarchical teaching structures | “I think when you are able to do something, it sticks with you. It's like when you're involved in doing something, you do it better. So, when you do your research and bring feedback, once the lecture guides you on what to learn and the scope of what you have to learn, you get a better understanding of what you are doing. Sometimes, when the lecture comes to class, some of us doze off, but if it's self-paced, you know your objective for what you are to meet. So, I would prefer the second one, where the lecturer guides us while we take the lead on what we want to study” (Participant 501).  “In the learner-centred method, you, the learner, are more involved than the one that the lecturer will rattle everything, and the lecture ends there” (Participant 207).  "I think I will go with the two, with the points you gave, because sometimes the traditional way of learning or teaching also helps in a way that when the person is really teaching you, you can relate some things to what you are learning from the person. Sometimes you can do even more investigations and learn more from what the person is trying to teach you"(Participant 210). |
| Subtheme 2.3: Diversity in Learning Environment | - Flexible learning modalities (hybrid/blended)- - Hybrid learning model -Combination of in-person and virtual sessions - Adaptable to work schedules and family responsibilities/ duties - Options for: Weekday evening classes, Weekend workshops, Recorded online content - Accessible physical and digital spaces - Small group settings, well-ventilated, comfortable rooms - Prioritized factors: - Flexibility of scheduling - Ability to interact and discuss - Minimal disruption to work commitments - Visit centers/special schools/NGOs for people with disabilities for engagement - Disability-friendly spaces - Physical classroom /Location should be able to host people with disability as they expect them as educators - Technology-enabled learning platforms – Digital platforms: Zoom, WhatsApp, Telegram, Microsoft Teams, Google Meet   . | “With both virtual and in-person, if there are times when the class moves to, maybe we can visit some of the homes or facilities where we have disabilities so that we actually see and observe some of the behaviour. This way, when you are educating, it will be based on experience, and the information you give will be more impactful” (Participant 207).  “Looking at my work and my kids, I will prefer a combination. The online and the in person” (Participant 504).  "I think it should be one-on-one. It should be in the lecture hall so that you can concentrate more. You see virtual sometimes, when you are virtual learning, sometimes you are a bit distracted, since most of time you can even on, you can even join the virtual, the Zoom and leave, and then we go and be doing attending to something else" (Participant 104).  “My reason being that the virtual learning environment is more accessible, and you know, we are working, for instance, I go to work at eight and close at four, so if I have a free period, I can easily go online and quickly do my reading and learn” (Participant 505).  "Virtual is also expensive. I need a phone good enough to be on Zoom, a better charger, and a conducive area, so maybe you have to go to the internet cafe or the restaurant"(Participant 202). |
| Subtheme 2.4: Diverse Educators Who Embrace Humanistic Teaching Methods | - Approachable and empathetic - Knowledgeable, Deep subject expertise with practical experience - Ability to facilitate discussions - Skilled communicator - Adaptable teaching styles - Patient and flexible - Sense of humor and seriousness - Potential involvement of disabled educators - Guest speakers with disability expertise - Encouragement of questions - Addressing complex topics in accessible language - Patient and friendly instructor approach | "The teacher-student relationship should be maintained. There should be a gap between them, but the teacher has to be receptive enough for students to express themselves. Everybody is a potential student, provided you are under somebody that you are learning from; you are a student, and he, the teacher, can also be a student. So he has to be receptive enough for us to trust whatever he will impact on us" (Participant 510).  "We would like a lecturer who will make the program very interesting so that even when you are at home or somewhere, you would like to join the class and then make the English very simple to understand”  (Participant 201).  "I side with everyone, a little bit of this, everything I'm in a 'collabo', strict, friendly, approachable, tolerance, empathetic, because sometimes some of us are emotional. So you need to come to our level to be able to understand us, so that we can continue from where we stopped the other time"(Participant 507). |
| Subtheme 2.5: Affordability | Cost barriers | "I'm interested; I have this dream of specializing in that area. So, I think if it's for free, I'll be able to, I mean, be committed to it, because, you know, salary wise, nurses, we are down with cash" (Participant 507).  "I think it should be free, the course should be free and then pay for the certificate so that we don't limit others from joining, because if we charge and then somebody is not able to afford it, the person may not be able to take part. I think it should be something that most nurses, especially those who the schools should be aware of, should have the knowledge of. So paying for it will limit some people from taking part. So I think it should be created, and then you pay for the certificate; that's my opinion” (Participant 506).  "It should be a token that management can float or go ahead for us to benefit because we cannot, because we the health workers all our trainings are free. So if we are to pay, be it in the form of something little, maybe a small registration fee or something, so that at least we can all benefit ” (Participant 606). |
| Subtheme 2.6: Responsibility and Support from Stakeholders | - Leaders in hospitals need to be involved - Ghana Education Service - SHEP - Ministry of Health, Government of Ghana - Evaluation of work and expectations in this field | "I don't know how well our superiors are invested in this program, whether you know when they are actually involved in everything and the support is there. You might be getting some resistance if they just know that we are participating in a research, without knowing, and maybe you start the training, and it is going to coincide somehow with your work. I know PML because the doctors are involved; they understand. The Medical superintendent is even part of the whole thing, but as for us, I don't know whether our directors know how it will go so that when we start, we get the full support. " (Participant 207).  "I also want to find out if Ghana Education Services, is in the know of this because usually when you want to enter the school, you just don't go on your own accord. And sometimes we have a lot of resistance from the teachers, even when their bosses have given the go-ahead. So we want to know if they are in the know. If possible, they have School Health Education Program (SHEP) coordinators. If they could also be part of this, they would also get the information when we get it. Then the information will trickle down to other teachers as well ” (Participant 202).  “I just don't understand because Ghana is 50 to 60 years old, and it is high time that some of these courses were being run. Had it not been for this programme, I would never have known that some of these courses are not being studied. Therefore, I would suggest that the management, or perhaps those organising this, do this course, that this will do a great deal of good for the country." (Participant 101). |
| Theme 3: Professional Development | | |
| Subtheme 3.1: Attitudinal transformation | - Breaking down misconceptions about disabilities - Developing non-discriminatory perspectives with people with disabilities - Cultivating patience and approachability to people with disabilities - Promoting inclusive thinking - Challenging societal stigmas | "I should be able to develop the attitude in the sense of being approachable and then patient in my dealings with disability people" (Participant 605).  "Empathy. You should have that empathic attitude, as in having, feeling like assuming you have that condition here, so you have empathy for that child, or that disabled person" (Participant 403) |
| Subtheme 3.2: Acknowledgement and Recognition | - Certification opportunities - Graduation celebration and party - Continuing Professional Development (CPD) points - Career advancement potential | “Yes, I'll also go with CPD, certification and party” (Participant 202).  “Graduation for the course. Yes” (Participant 206);  "When you go for a day and you're given CPD points. So, if this will be for six or six weeks to two months, it will give you more credit hours. Both CPD and certificate. So that we can renew to get our PINs” (Participant 207).  "Certificates and CPD. The reason is that at least you need something that would show that you've really gone through a training like this. And to renew your PINs, because you have built some skills, and even with the certificates, it can open many avenues for you, especially for some of us who want to travel later” (Participant 401).  "The reason being that, as things... Everyone is abreast with time right now, things are changing. So when, in any case, I get a job, I can attach the certificate to boost my chances of securing that job in a disability area. The CPD would also boost my marks with other workshops” (Participant 506). |
